# Supplementary material for: The Effects of Diet Formulation on the Yield, Proximate Composition, and Fatty Acid Profile of the Black Soldier Fly (Hermetia illucens L.) Prepupae Intended for Animal Feed
Source: PubMed Central journal article supplement (PMC6523828; doi:10.3390/ani9040178), 2019-04-19
Supplement: animals-09-00178-s001.pdf [file animals-09-00178-s001.pdf]

# Effects of Diet Formulation on the Yield, Proximate Composition and Fatty Acid Profile of the Black Soldier Fly (*Hermetia illucens* L.) Prepupae Intended for Animal Feed.

Pier Paolo Danieli<sup>1</sup>, Carola Lusiana<sup>2</sup>, Laura Gasco<sup>2</sup>, Andrea Amici, Bruno Ronchi<sup>1</sup>

<sup>1</sup> Department of Agriculture and Forest Sciences; University of Tuscia, Viterbo, Italy; amici@unitus.it; ronchi@unitus.it

<sup>2</sup> Department of Agricultural Forest and Food Sciences; University of Torino, Grugliasco (TO), Italy; carola.lussiana@unito.it; laura.gasco@unito.it

\* Correspondence: danieli@unitus.it; Tel.: +39-0761-357349

**Table S1.** Effect of decolorization treatment with potassium permanganate (KMnO<sub>4</sub>) on the weight loss of three different samples of black soldier fly prepupae (BSFP) meal submitted to the demineralization/deproteinization procedure described by Liu et al. [36].

| Sample  | Total initial weight <sup>1</sup> (g) | Total post demineralization/deproteinization treatment weight (g) | Total post-decolorization treatment weight (g) |
|---------|---------------------------------------|-------------------------------------------------------------------|------------------------------------------------|
| #1      | 0.095                                 | 0.046                                                             | 0.046                                          |
| #2      | 0.094                                 | 0.045                                                             | 0.045                                          |
| #3      | 0.099                                 | 0.049                                                             | 0.049                                          |
| Average | 0.096                                 | 0.047                                                             | 0.047                                          |

<sup>1</sup> Total weight includes the weight of the ANKOM modified bag and the weight of BSFP meal.
